# Supplementary material for: Regional-Scale Declines in Productivity of Pink and Chum Salmon Stocks in Western North America
Source: PLOS journal article supplement (doi:10.1371/journal.pone.0146009), 2016-01-13

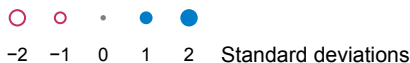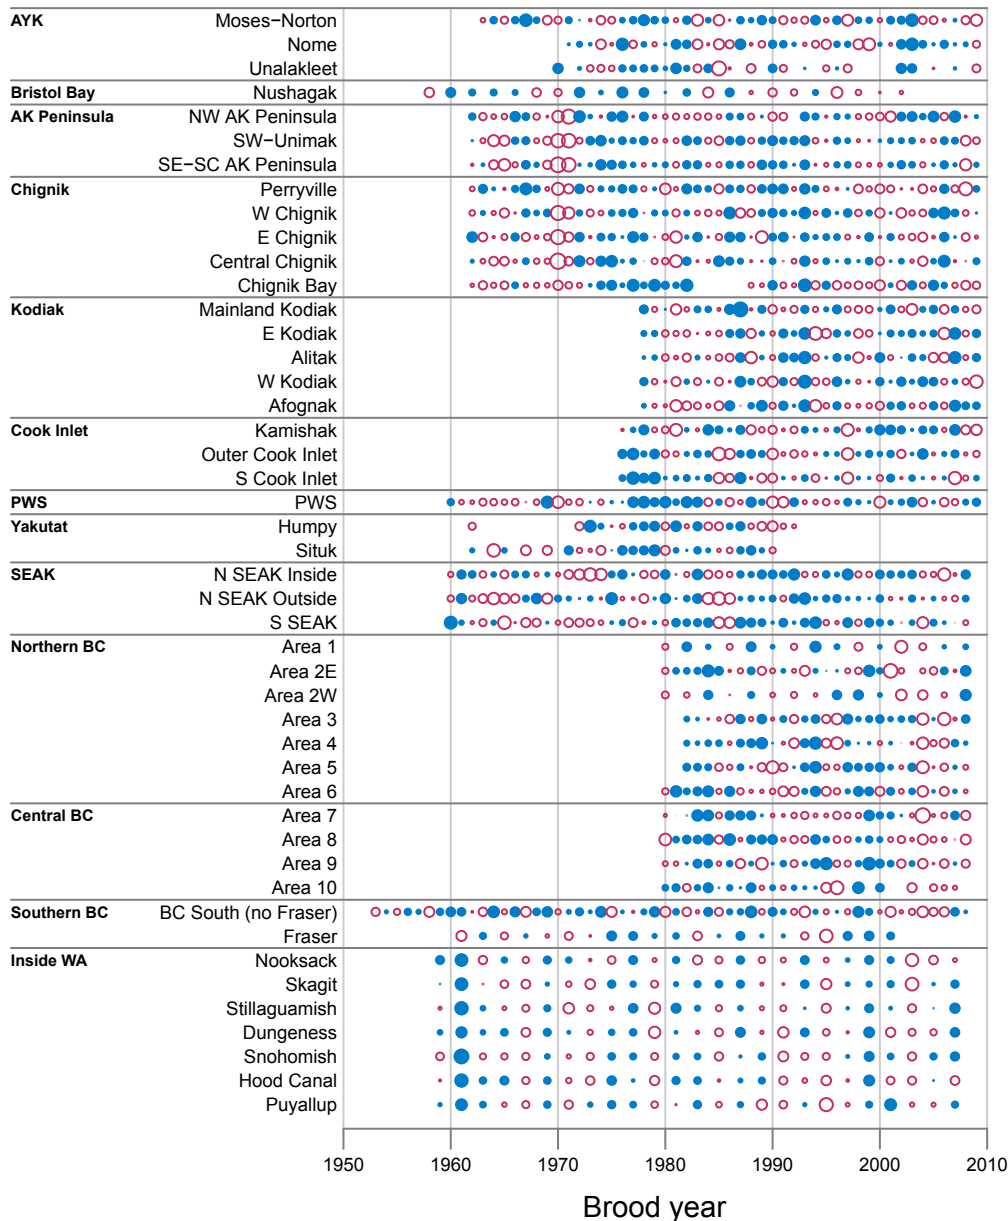

Supplement: S3 (10.1371/journal.pone.0146009.s003) [file journal.pone.0146009.s003]
